# Supplementary material for: Functionalized carbo- and heterocycles via Pt-catalyzed asymmetric alkoxycyclization of 1,6-enynes
Source: Royal Society of Chemistry journal article supplement (doi:10.1039/b400908h), 2004-01-01
Supplement: b400908h.doc [file b400908h.doc]

**General procedure for asymmetric alkoxycyclization of enyne with (*R*)-Ph-BINEPINE**

A mixture of enyne1 (1 eq.), PtCl2 (M = 266.0) (5 or 10 mol%), (*R*)-Ph-BINEPINE (M = 388.44, 3 eq./metal) and silver salt AgSbF6 (M = 343.6, 0.25 eq) was degassed and stirred at 60-80°C in MeOH (screw-capped tube at 80°C) or 14% aqueous dioxane (1.75 ml solvent/ mmol starting material). After completion of the reaction the mixture was cooled to room temperature, filtered through a short pad of Florisil gel (cyclohexane/EtOAc, 70 :30) and the solvents were evaporated under reduced pressure. The crude product was purified if necessary by Florisil gel flash chromatography (cyclohexane/EtOAc, 90 :10).

**(+)-2a** : []D22 = +68.2 (c = 0.11, CHCl3), **(+)-2b** : []D22 = +51.2 (c = 0.13, CHCl3), **(+)-2c** : []D22 = +14.8 (c = 0.23, CHCl3), **(+)-2d** : []D22 = +14.3 (c = 0.11, CHCl3), **(+)-3b** : []D22 = +53.3 (c = 0.12, CHCl3), **(+)-3c** : []D22 = +18.5 (c = 0.14, CHCl3).

The absolute configurations of the alcohols obtained from hydroxycyclizations were determined by empirical methods from the 1H NMR spectra2 of the *O*-methylmandelate esters **4** derived from **2b**.

By comparing the upfield or downfield shifts of protons in the two diastereomers **4**, the absolute configuration of the carbon bearing the secondary alcohol can be assigned. As the hydroxycyclization is completely diastereoselective, the absolute configuration of the second stereocenter follows from the first one. This allowed us to establish that (*R*)-Ph-BINEPINE induced the preferential formation of (*S*,*S*)-**2b**. On similar arguments, we could also draw the conclusion that the (*R*,*S*) enantiomer of **2a** was predominantly obtained using (*R*)-Ph-BINEPINE as the ligand.

**Syntheses and characterizations of esters 4**

**4** : To a solution of 92 mg (268 mol, 1 eq.) of alcohol **2b**, 3.3 mg (26.8 mol, 0.1 eq., M = 122.2) of DMAP, and 66.8 mg (402 mol, 1.5 eq., M = 166.18) of (*S*)--methoxyphenyl acetic acid in 3 ml of anhydrous dichloromethane were added at 0°C 77 mg (602 mol, 1.5 eq.) of EDCI. The mixture was allowed to slowly warm to room temperature. After completion of the reaction the suspension was quenched with water and extracted three times with dichloromethane. The combined organic layers were washed with a saturated aqueous NaHCO3 solution then with a saturated aqueous NaCl solution, dried over MgSO4, filtered and concentrated under reduce pressure. The crude mixture was purified by Florisil gel flash chromatography (cyclohexane:ethyl acetate, 90:10) to afford separately the two diastereomers **4**: 20 mg of the first eluted product (Rf = 0.6 in cyclohexane:ethyl acetate, 70:30, KMnO4) and 23 mg of the second (Rf = 0.55 in cyclohexane:ethyl acetate, 70:30, KMnO4).

**(*S*,*S*,*S*)-4** : []D25 = +53.9 (c = 0.14, CHCl3); 1H NMR (400 MHz, CDCl3, 23°C, TMS):  = 7.56 (d, *J* = 8.3 Hz, 2H), 7.36-7.26 (m, 10H), 7.18-7.16 (m, 2H), 5.75 (d, *J* = 6.3 Hz, 1H), 4.70 (s, 1H), 4.64 (q, *J* = 2.1 Hz, 1H), 4.39 (q, *J* = 2.1 Hz, 1H), 3.70 (d, *J* = 13.8 Hz, 1H), 3.32 (s, 3H), 3.27 (dq, *J* = 13.8, 2.1 Hz, 1H), 3.17 (dd, *J* = 9.6, 7.7 Hz, 1H), 3.08 (m, 1H), 2.88 (dd, *J* = 9.6, 6.8 Hz, 1H), 2.45 ppm (s, 3H); 13C NMR (100 MHz, CDCl3, DEPT):  = 169.5 (C), 143.8 (C), 142.6 (C), 137.8 (C), 136.1 (C), 132.5 (C), 129.7 (CH), 128.7 (CH), 127.9 (CH), 127.3 (CH), 126.6 (CH), 109.5 (CH2), 82.5 (CH), 75.5 (CH), 57.3 (CH3), 52.5 (CH2), 49.5 (CH2), 47.8 (CH), 21.6 ppm (CH3); HRMS-DCI calcd for C28H30NO5S [M+H]+ 492.1845, found 492.1841.

**(*R*,*R*,*S*)-4** : []D25 = -6.1 (c = 0.18, CHCl3); 1H NMR (400 MHz, CDCl3, 23°C, TMS):  = 7.65 (d, *J* = 8.3 Hz, 2H), 7.35-7.26 (m, 10H), 7.16-7.14 (m, 2H), 5.75 (d, *J* = 6.3 Hz, 1H), 4.87 (q, *J* = 2.1 Hz, 1H), 4.72 (s, 1H), 4.58 (q, *J* = 2.1 Hz, 1H), 3.81 (d, *J* = 13.8 Hz, 1H), 3.67 (dq, *J* = 13.8, 2.1 Hz, 1H), 3.36 (s, 3H), 3.28 (dd, *J* = 9.9, 7.7 Hz, 1H), 3.19 (dd, *J* = 9.9, 6.2 Hz, 1H), 3.08 (m, 1H), 2.45 ppm (s, 3H); 13C NMR (100 MHz, CDCl3, DEPT):  = 169.3 (C), 143.9 (C), 142.9 (C), 137.6 (C), 135.9 (C), 132.6 (C), 129.8 (CH), 128.5 (CH), 127.9 (CH), 127.3 (CH), 126.2 (CH), 109.9 (CH2), 82.5 (CH), 75.6 (CH), 57.4 (CH3), 52.6 (CH2), 49.5 (CH2), 48.2 (CH), 21.6 ppm (CH3); HRMS-DCI calcd for C28H30NO5S [M+H]+ 492.1845, found 492.1847.

1 a) C. Nevado, L. Charruault, V. Michelet, C. Nieto-Oberhuber, M.P. Munoz, M. Mendez, M.-N. Rager, J.-P. Genêt, A.M. Echavarren, *Eur. J. Org. Chem.*, 2003, 706-713. b) M. Méndez, M. P. Muñoz, C. Nevado, D.J. Cárdenas, A.M.Echavarren, *J. Am. Chem. Soc.*,2001, **123**, 10511-10520. c) M. Méndez, M. P. Muñoz, A.M. Echavarren, *J. Am. Chem. Soc.*,2000, **122**, 11549-11550.

2 a) J.-C. Fiaud, A. Horeau *Stereochemistry*; H. B. Kagan, Ed.; George Thieme: Stuttgart, 1977; **Vol.3**, 51-94. b) B. Wu, H. S. Mosher, *J. Org. Chem.*, 1986, **51**, 1904-1906. c) B. M. Trost, J. L. Belletire, S. Godelski, P. G. McDougal, J. M. Balkovec, *J. Org. Chem.*, 1986, **51**, 2370-2374.I. d) Ohtani, T. Kusumi, Y. Kashman, H. Kakisawa, *J. Am. Chem. Soc.*, 1991, **113**, 4092-4096.
